# Supplementary material
Source: PubMed Central journal article supplement (PMC1283821)

**C309/UAS-tra<sup>F</sup>**

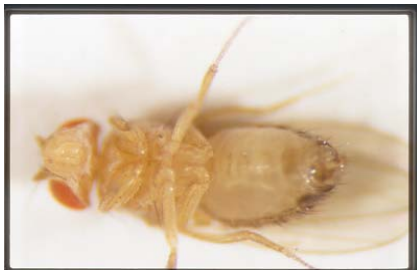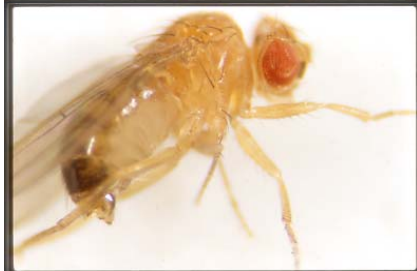

Supplement: pnas_0507056102_1.pdf [file pnas_0507056102_1.pdf]

*C309/egfp*

$\alpha$  FRU<sup>M</sup>

embryos

2 d-o pupae

A

B

C

anterior

posterior

VNC

D

E

F

40.00  $\mu$ m

40.00  $\mu$ m

40.00  $\mu$ m

80.00  $\mu$ m

80.00  $\mu$ m

80.00  $\mu$ m

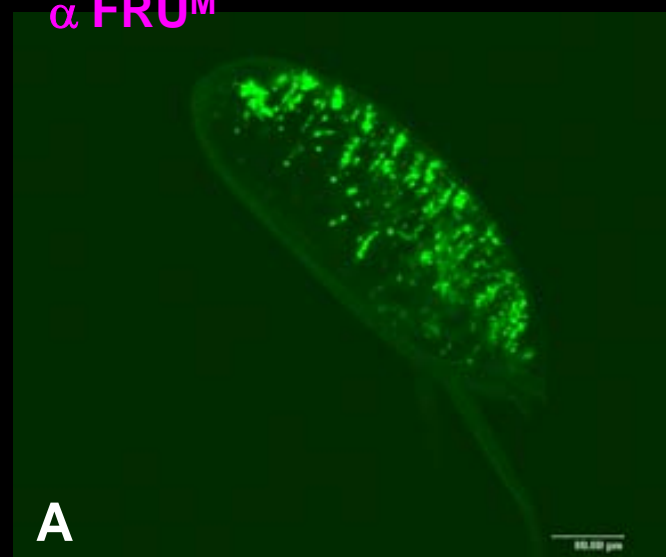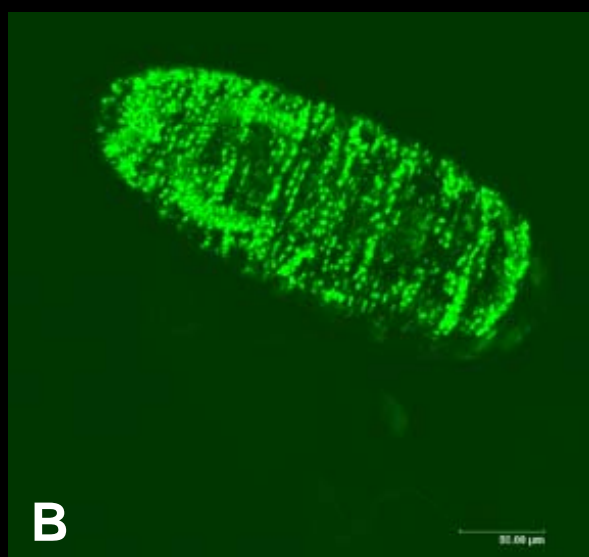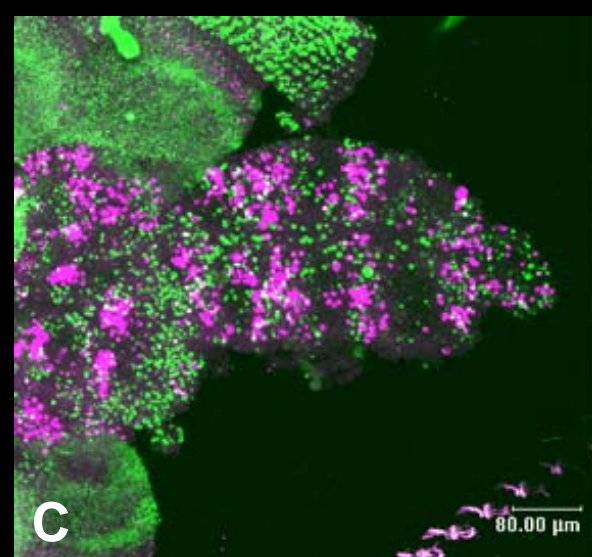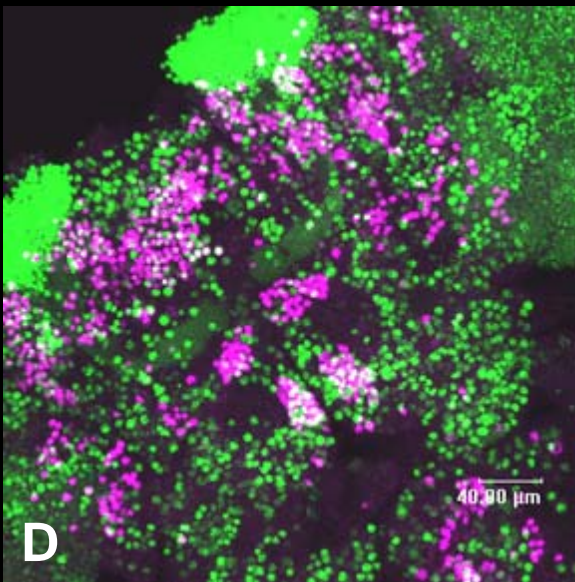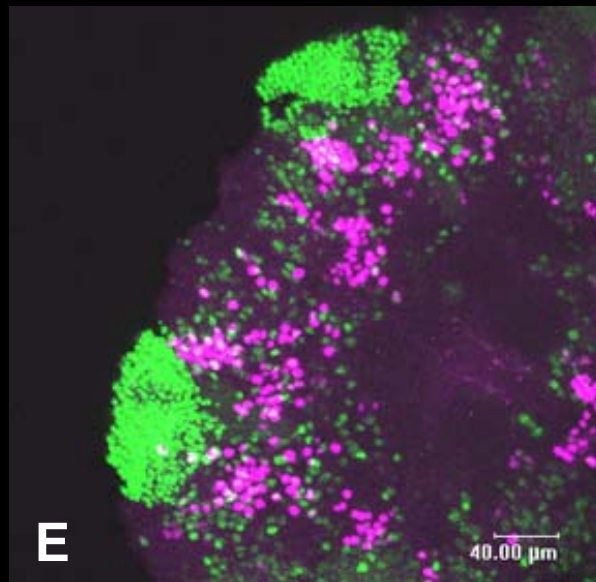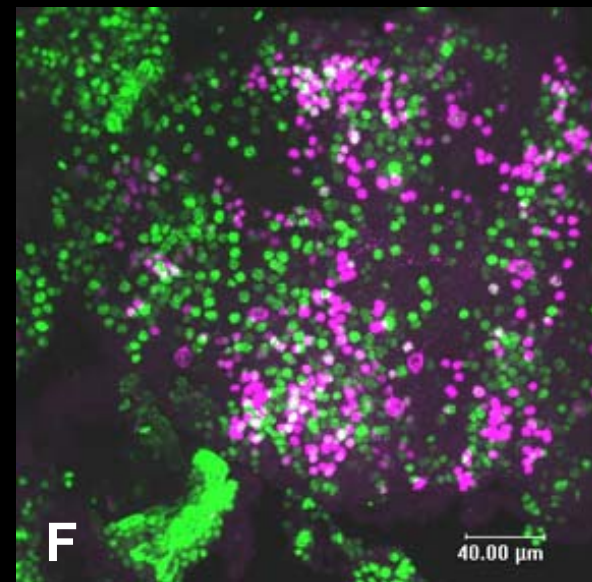

Supplement: pnas_0507056102_2.pdf [file pnas_0507056102_2.pdf]
